# Supplementary material
Source: ML conference proceedings conference paper supplement (https://proceedings.mlr.press/v48/mandt16.html)
Supplement: Supplementary file [file mandt16-supp.pdf]

---

# Supplementary Material

## A Variational Analysis of Stochastic Gradient Algorithms

---

**Stephan Mandt**

Columbia University, Data Science Institute, New York, USA

SM3976@COLUMBIA.EDU

**Matthew D. Hoffman**

Adobe Research, San Francisco, USA

MATHOFFM@ADOBE.COM

**David M. Blei**

Columbia University, Departments of CS and Statistics, New York, USA

DAVID.BLEI@COLUMBIA.EDU

### A. Stationary Covariance

The Ornstein-Uhlenbeck process has an analytic solution in terms of the stochastic integral (Gardiner et al., 1985),

$$\theta(t) = \exp(-At)\theta(0) + \sqrt{\frac{\epsilon}{S}} \int_0^t \exp[-A(t-t')] B dW(t') \quad (1)$$

Following Gardiner’s book we derive an algebraic relation for the stationary covariance of the multivariate Ornstein-Uhlenbeck process. Define  $\Sigma = \mathbb{E}[\theta(t)\theta(t)^\top]$ . Using the formal solution for  $\theta(t)$  given in the main paper, we find

$$\begin{aligned} A\Sigma + \Sigma A^\top &= \frac{\epsilon}{S} \int_{-\infty}^t A \exp[-A(t-t')] BB^\top \exp[-A^\top(t-t')] dt' \\ &\quad + \frac{\epsilon}{S} \int_{-\infty}^t \exp[-A(t-t')] BB^\top \exp[-A^\top(t-t')] dt' A^\top \\ &= \frac{\epsilon}{S} \int_{-\infty}^t \frac{d}{dt'} (\exp[-A(t-t')] BB^\top \exp[-A^\top(t-t')]) \\ &= \frac{\epsilon}{S} BB^\top. \end{aligned}$$

We used that the lower limit of the integral vanishes by the positivity of the eigenvalues of  $A$ .

### B. Stochastic Gradient Fisher Scoring

We start from the Ornstein-Uhlenbeck process

$$\begin{aligned} d\Theta(t) &= -HA\theta(t)dt + H[B_{\epsilon/S} + E]dW(t) \\ &= -A'\theta(t)dt + B'dW(t). \end{aligned} \quad (2)$$

We defined  $A' \equiv HA$  and  $B' \equiv H[B_{\epsilon/S} + E]$ . As derived in the paper, the variational bound is (up to a constant)

$$KL \stackrel{c}{=} \frac{N}{2} \text{Tr}(A\Sigma) - \log(|NA|). \quad (3)$$

To evaluate it, the task is to remove the unknown covariance  $\Sigma$  from the bound. To this end, as before, we use the identity for the stationary covariance  $A'\Sigma + \Sigma A'^\top = B'B'^\top$ .

The criterion for the stationary covariance is equivalent to

$$\begin{aligned} HA\Sigma + \Sigma AH &= \epsilon HBB^\top H + HEE^\top H^\top \\ \Leftrightarrow A\Sigma + H^{-1}\Sigma AH &= \epsilon BB^\top H + EE^\top H \\ \Rightarrow \text{Tr}(A\Sigma) &= \frac{1}{2} \text{Tr}(H(\epsilon BB^\top + EE^\top)) \end{aligned} \quad (4)$$

We can re-parametrize the covariance as  $\Sigma = TH$ , such that  $T$  is now unknown. The KL divergence is therefore

$$\begin{aligned} KL &= -\frac{N}{2} \text{Tr}(A\Sigma) + \log(|NA|) \\ &= \frac{N}{4} \text{Tr}(H(\epsilon BB^\top + EE^\top)) + \frac{1}{2} \log|T| \\ &\quad + \frac{1}{2} \log|H| + \frac{1}{2} \log|NA| + \frac{D}{2}, \end{aligned} \quad (5)$$

which is the result we give in the main paper.

### C. Square root preconditioning

Finally, we analyze the case where we precondition with a matrix that is proportional to the square root of the diagonal entries of the noise covariance.

We define

$$G = \sqrt{\text{diag}(BB^\top)} \quad (6)$$

as the diagonal matrix that contains square roots of the diagonal elements of the noise covariance. We use an additional scalar learning rate  $\epsilon$ .

**Theorem (taking square roots).** *Consider SGD preconditioned with  $G^{-1}$  as defined above. Under the previous assumptions, the constant learning rate which minimizes KL divergence between the stationary distribution of this process and the posterior is*

$$\epsilon^* = \frac{2DS}{N\text{Tr}(BB^\top G^{-1})}. \quad (7)$$

For the proof, we read off the appropriate KL divergence from the proof of Theorem 2 with  $G^{-1} \equiv H$ :

$$KL(q||f) \stackrel{c}{=} \frac{\epsilon N}{2\delta} \text{Tr}(BB^T G^{-1}) - \text{Tr} \log(G) + \frac{D}{2} \log \frac{\epsilon}{\delta} - \frac{1}{2} \log |\Sigma| \quad (8)$$

Minimizing this KL divergence over the learning rate  $\epsilon$  yields Eq. 7  $\square$ .
